# Supplementary material for: Coexpression Analysis of Transcriptome on AIDS and Other Human Disease Pathways by Canonical Correlation Analysis
Source: Int J Genomics. 2017 Jun 14;2017:9163719. doi: 10.1155/2017/9163719 (PMC5488239; doi:10.1155/2017/9163719)
Supplement: Supplementary file 1 — Table 1 HIV host genetic factor genes. [file 9163719.f1.xlsx]

## Sheet: Sheet1
Table 1 HIV host genetic factor genes
Gene ID	Effect	Gene symbol
1672		DEFB1
2669	Delays AIDS	KIR
2765		GML
3105	Delays AIDS	HLA-A
3106	Delays AIDS	HLA-B
3107	Delays AIDS	HLA-C
3417	Prevents infection	IDH1
3458	Accelerates AIDS	IFENG
3565		IL4
3577		CXCR1
3586	Accelerates AIDS	IL10
3659		IRF1
4627	End stage renal Disease	MYH9
5478	Accelerates AIDS	PPIA/CypA
5629	Delays AIDS progression	PROX1
6004		Slurp2/Ly6
6347		CCL2
6351		CCL4
6352		CCL5
6356		CCL11
6361		CCL17
6362		CCL18
6387	Delays AIDS	SDF1/CXCL12
7099		TLR4
7251	Accelerates AIDS	TSG101
8065	Accelerates CD4 loss	CUL5
8581		LY6D
9582	Increase infection	APOBEC3B
9612	Increase infection	NCOR2
10455	Accelerates AIDS	PECI/ECI2
10663	Accelerates AIDS	CXCR6
10866	HIV set point	HCP5
30834		ZNRD1
30835	Decreases infection	DC-SIGN
51311		TLR8
54106		TLR9
57152		Slurp1
60489	Accelerates AIDS	APOBEC3G
85363	Increase infection	TRIM5a
